# Supplementary material
Source: PubMed Central journal article supplement (PMC9539513)

**Appendix S2:** Floral shape predicts bee–parasite transmission potential. Mario S. Pinilla-Gallego, Wee-Hao Ng, Victoria E. Amaral, and Rebecca E. Irwin. *Ecology*.

## **Floral trait measurements and droplet location(s) for the *Crithidia bombi* survival experiment.**

The following images depict traits that we measured as corolla length and width for each species. In all figures below, ‘CL’ indicates corolla length and ‘CW’ indicates corolla width.

The blue dots  indicate the location(s) where we placed the inoculum for the survival experiment. Not all species were included in this experiment, and for some species we only tested one location.

*Agastache foeniculum*

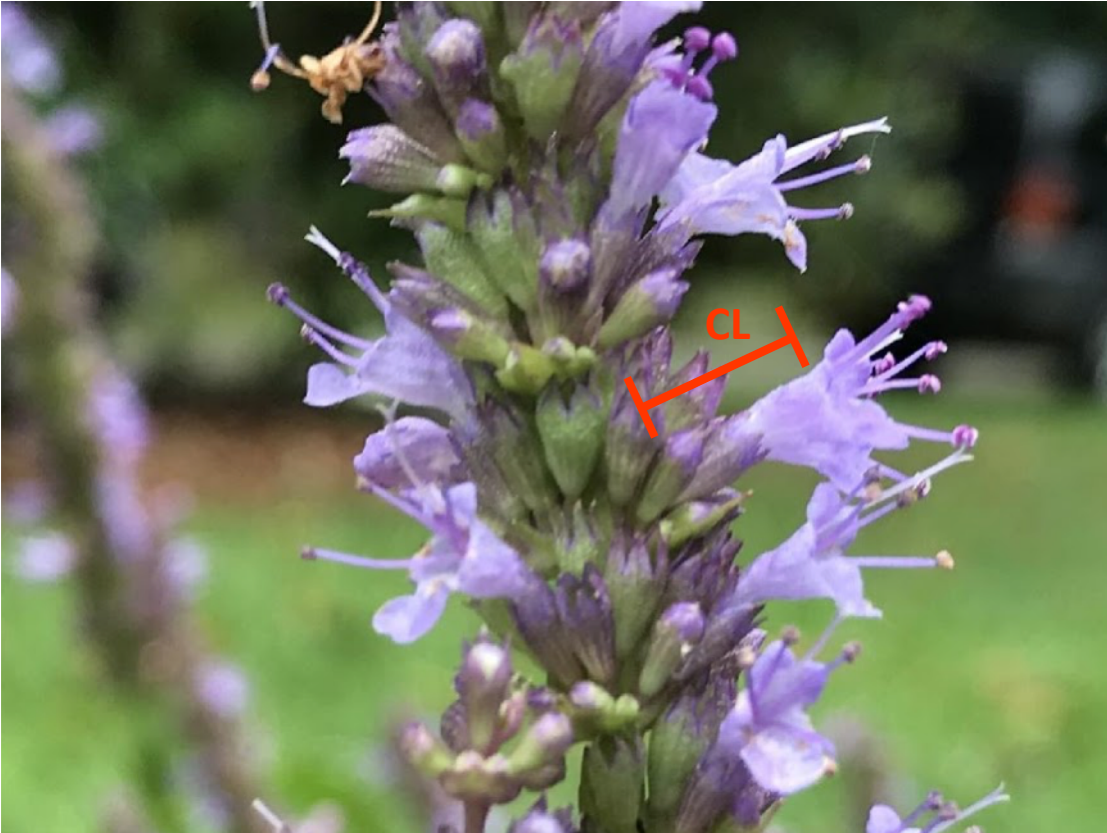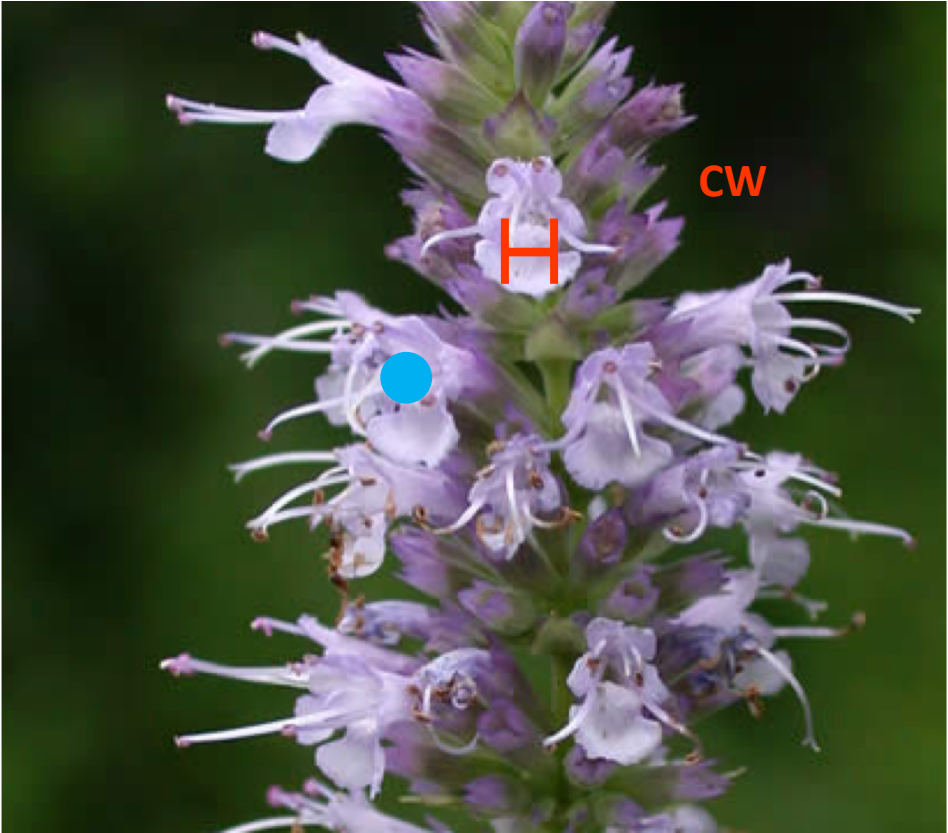

*Angelonia angustifolia*

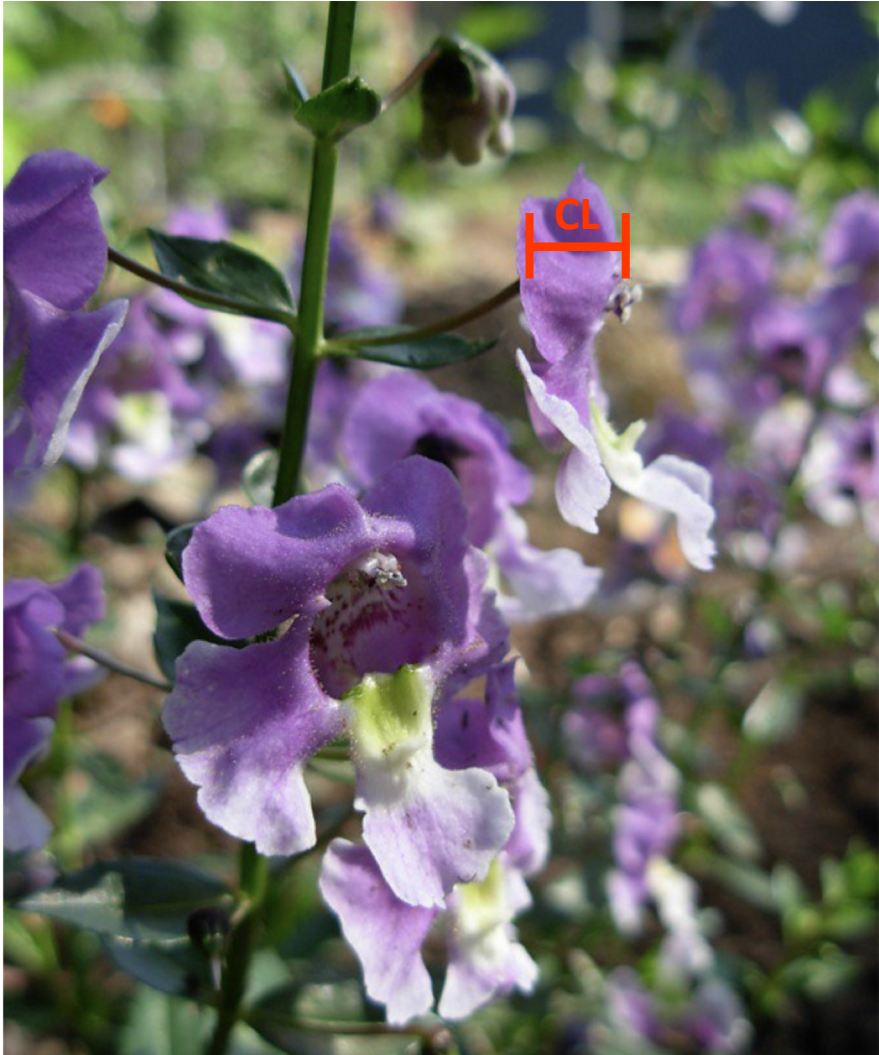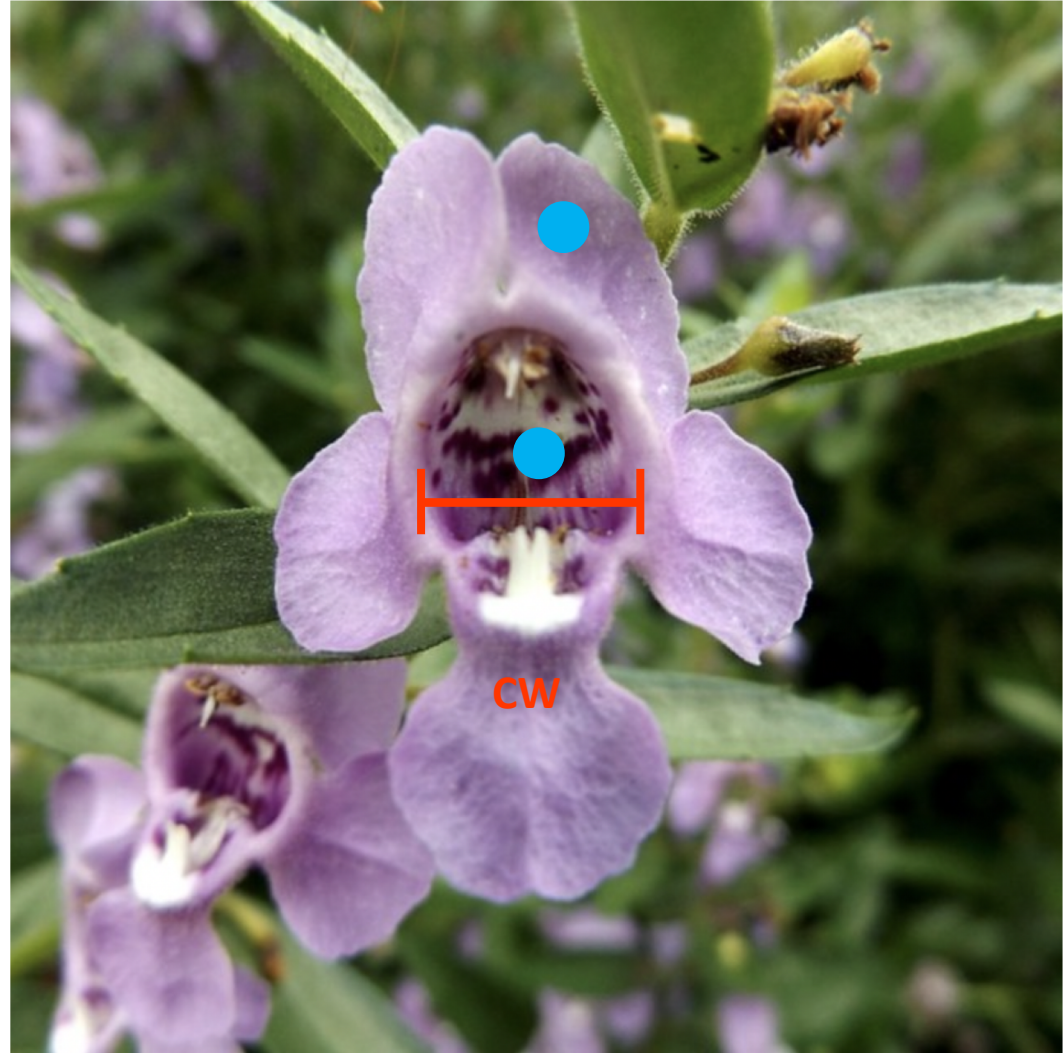

*Antirrhinum majus*

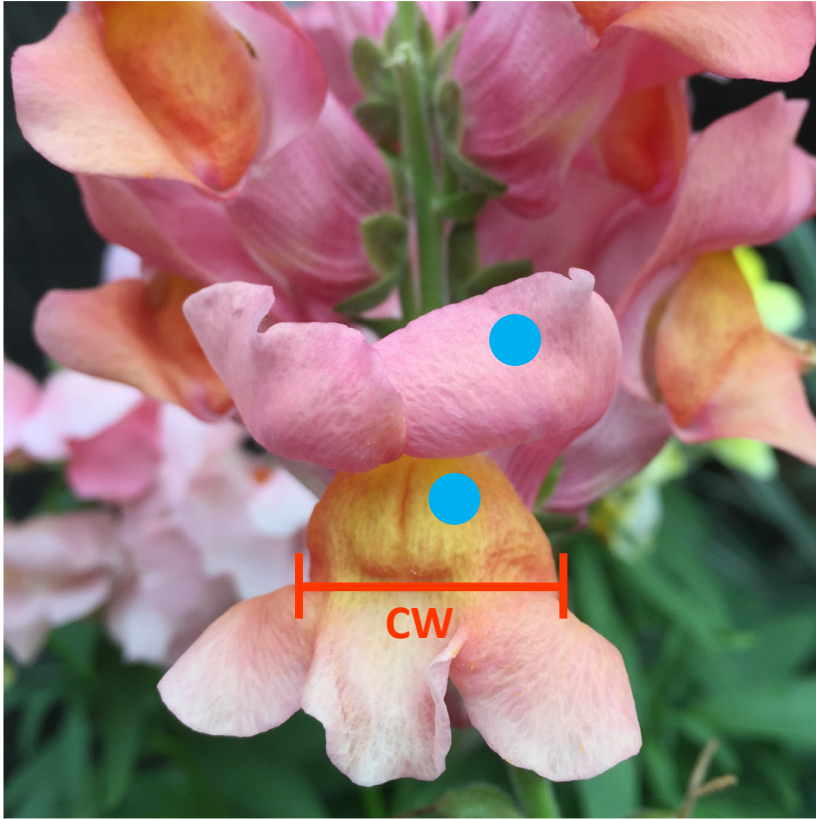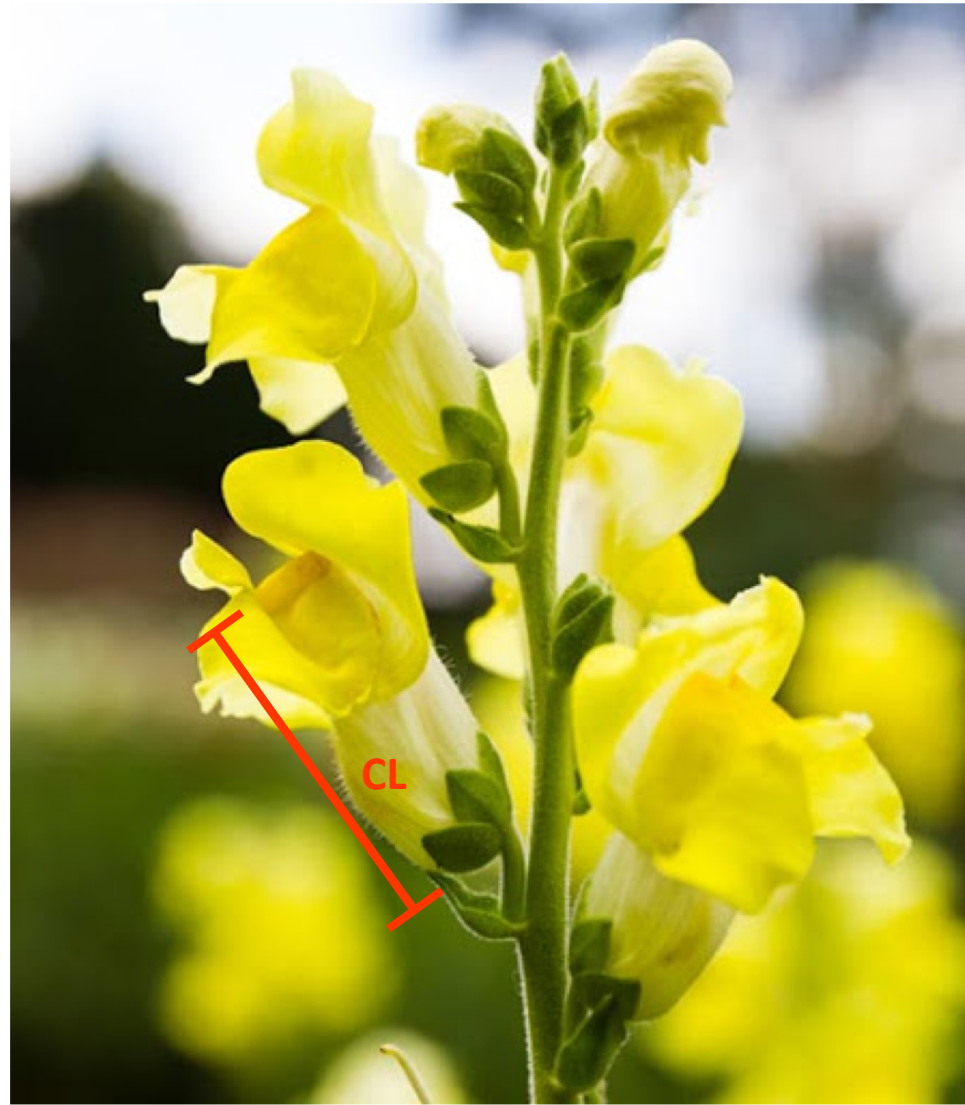

*Asclepia tuberosa*

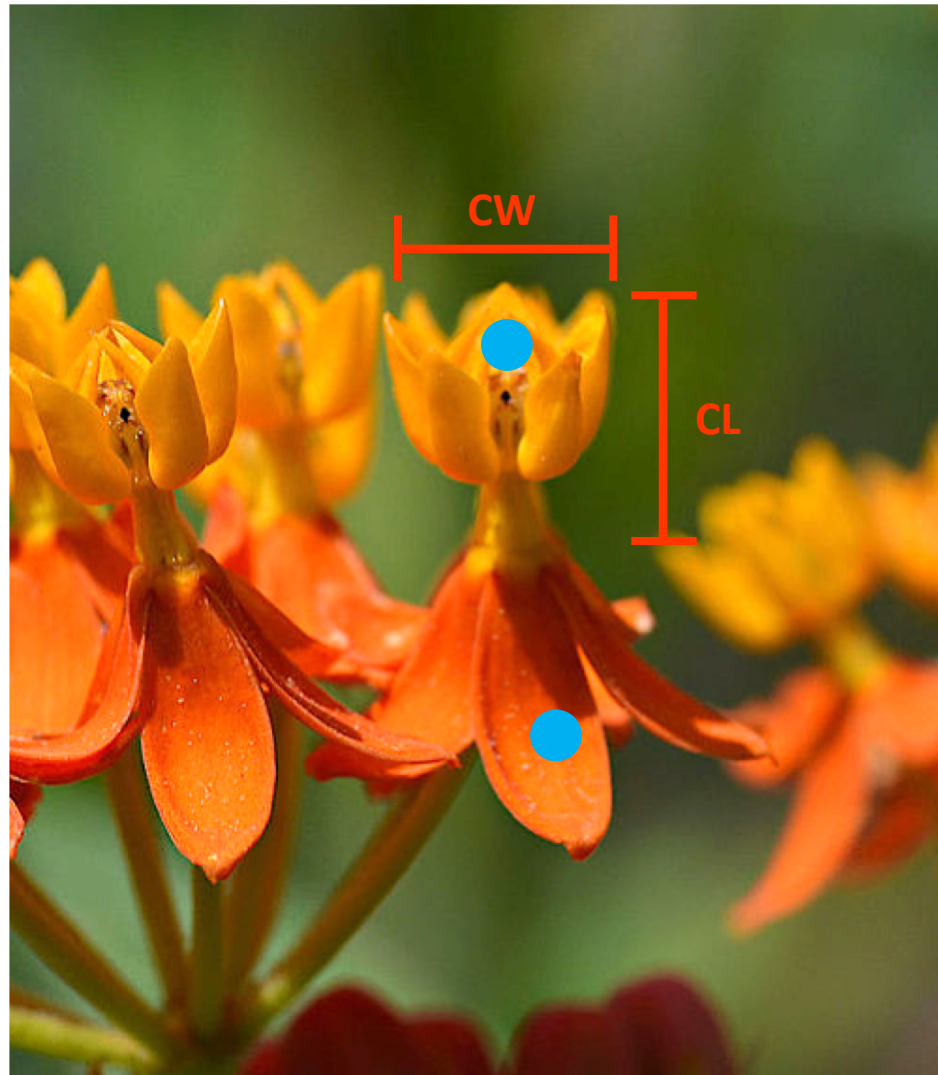

*Caryopteris clandonensis*

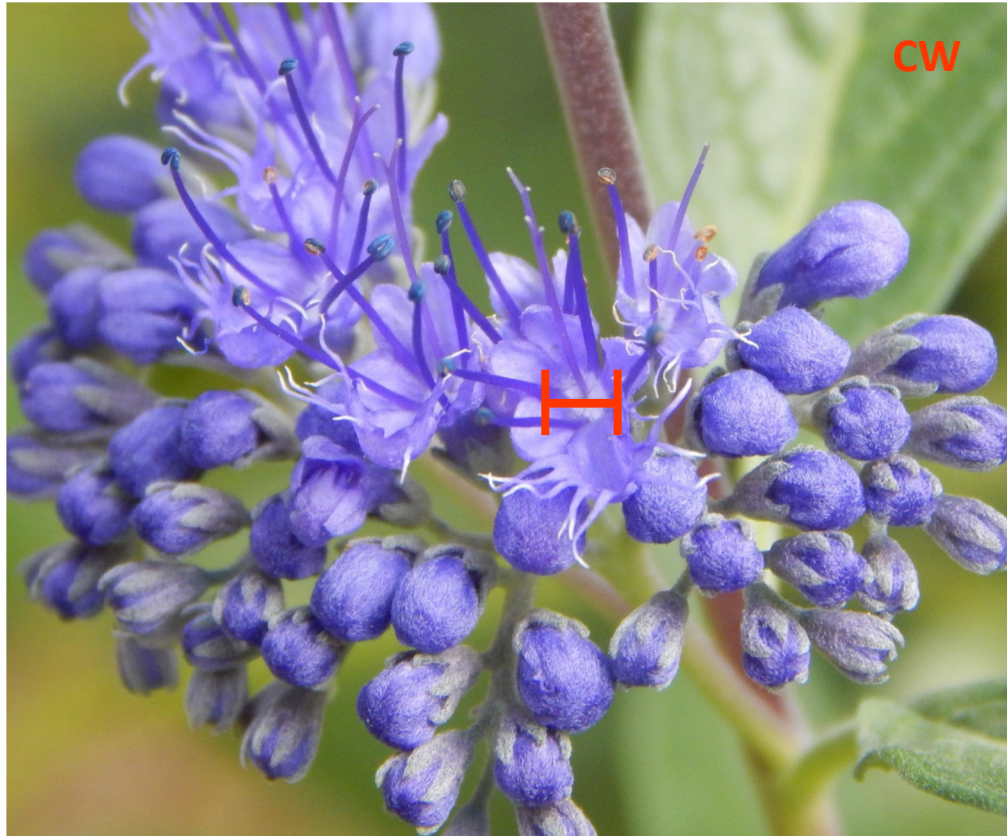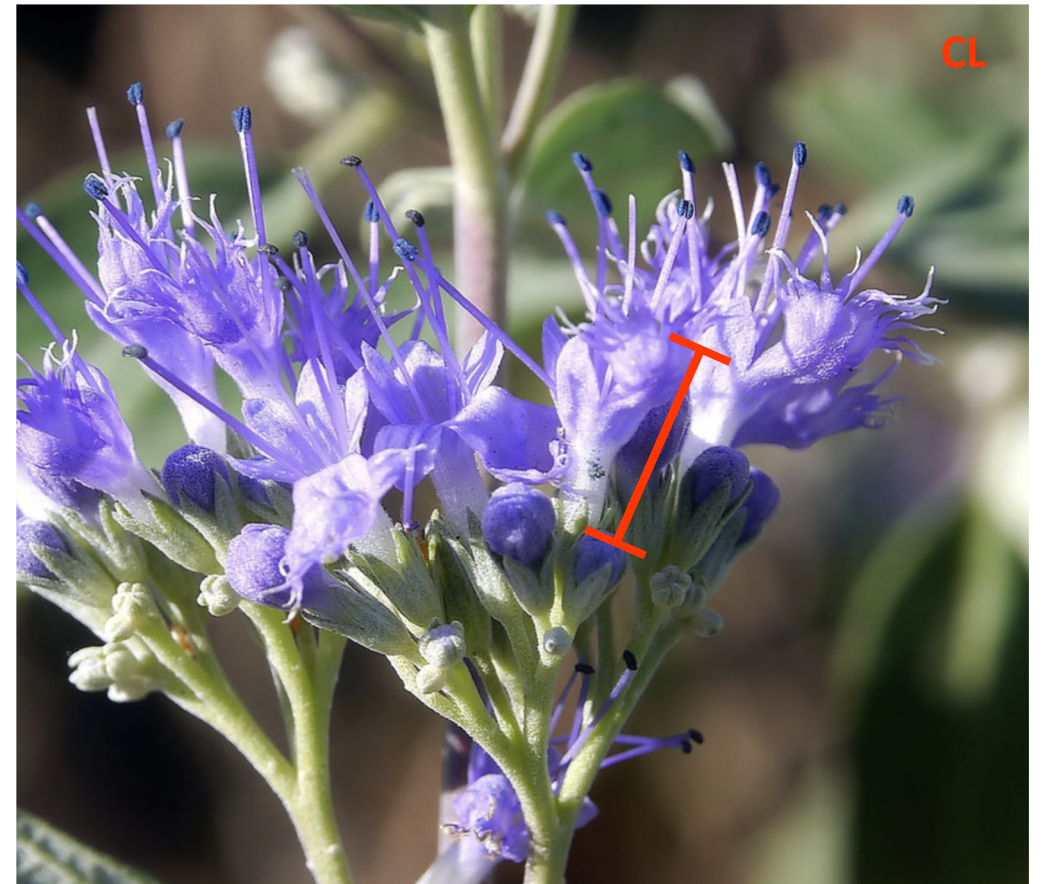

*Coreopsis verticillata*

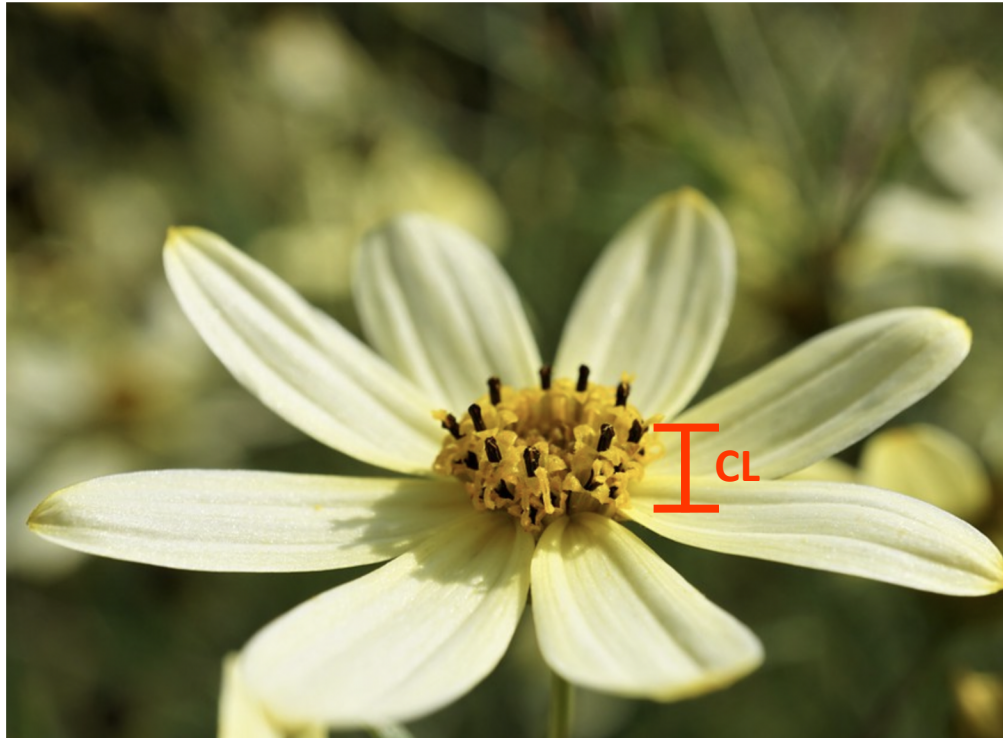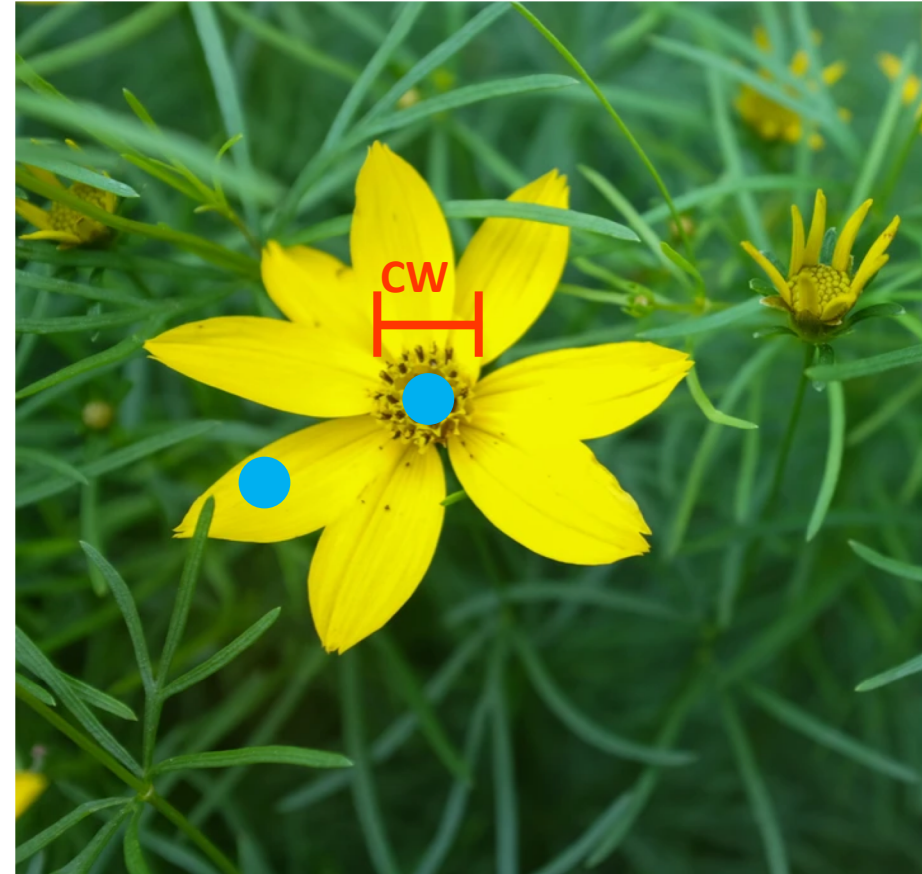

*Echinacea purpurea*

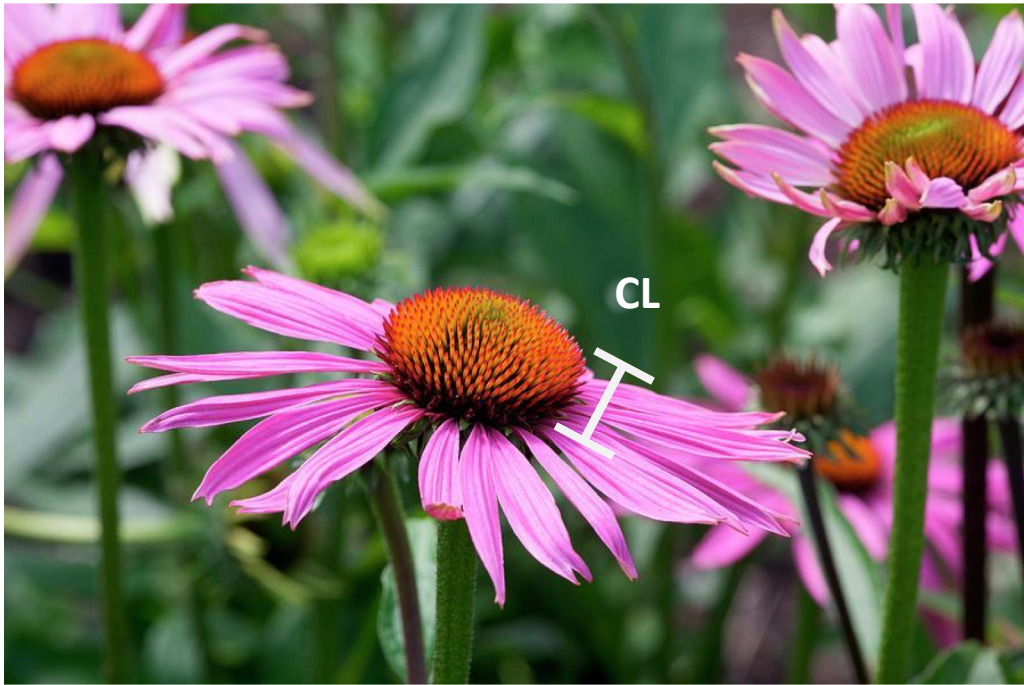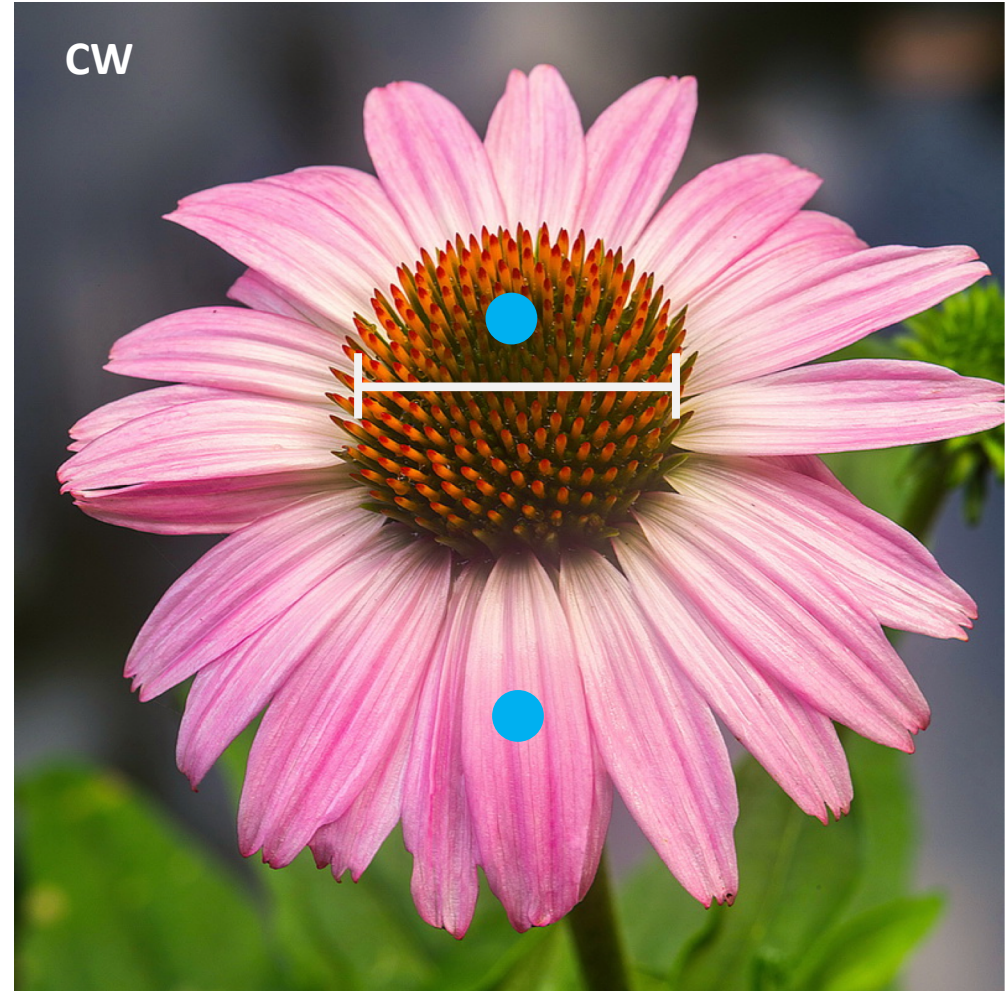



*Kalimeris integrifolia*

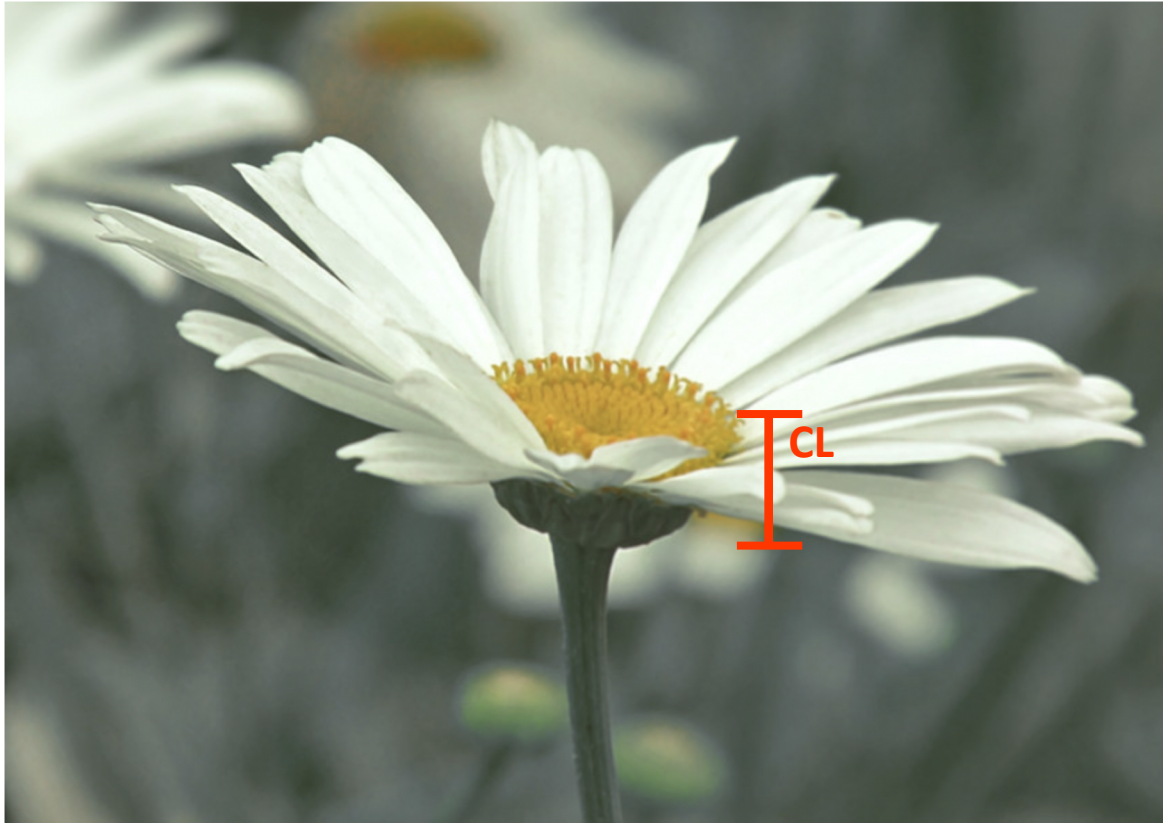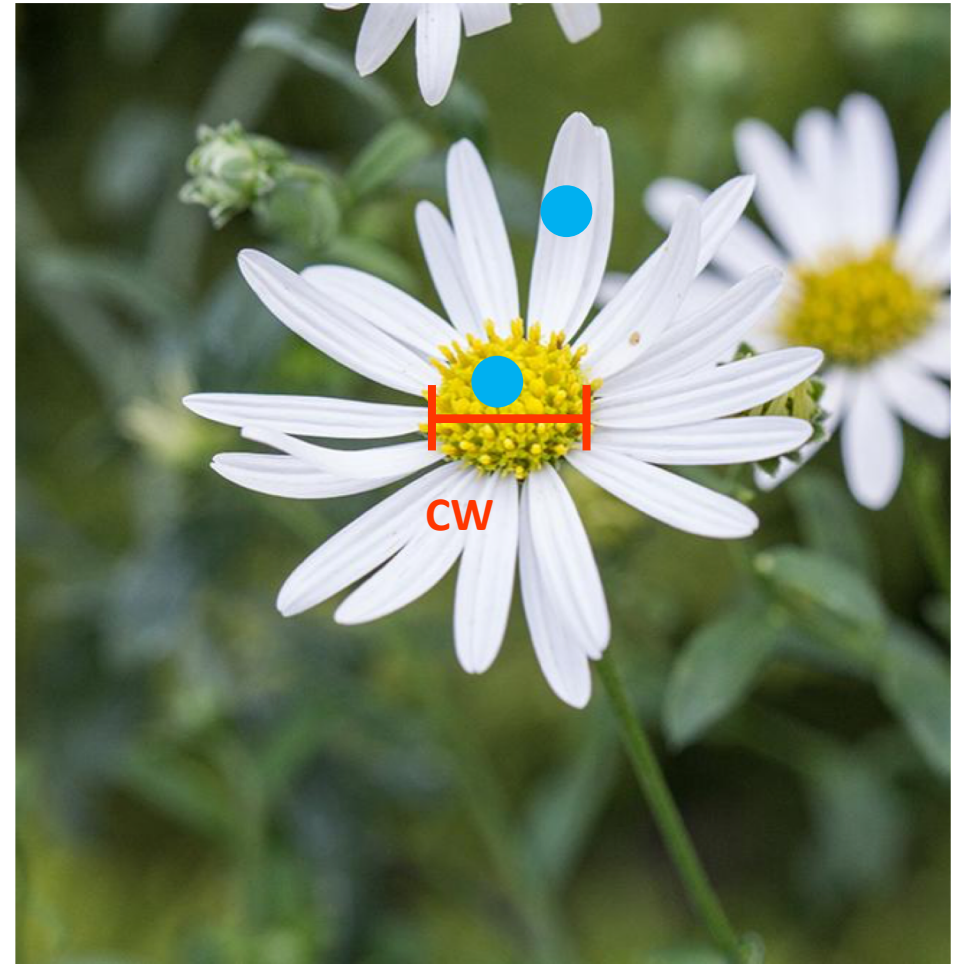

*Lantana camara*

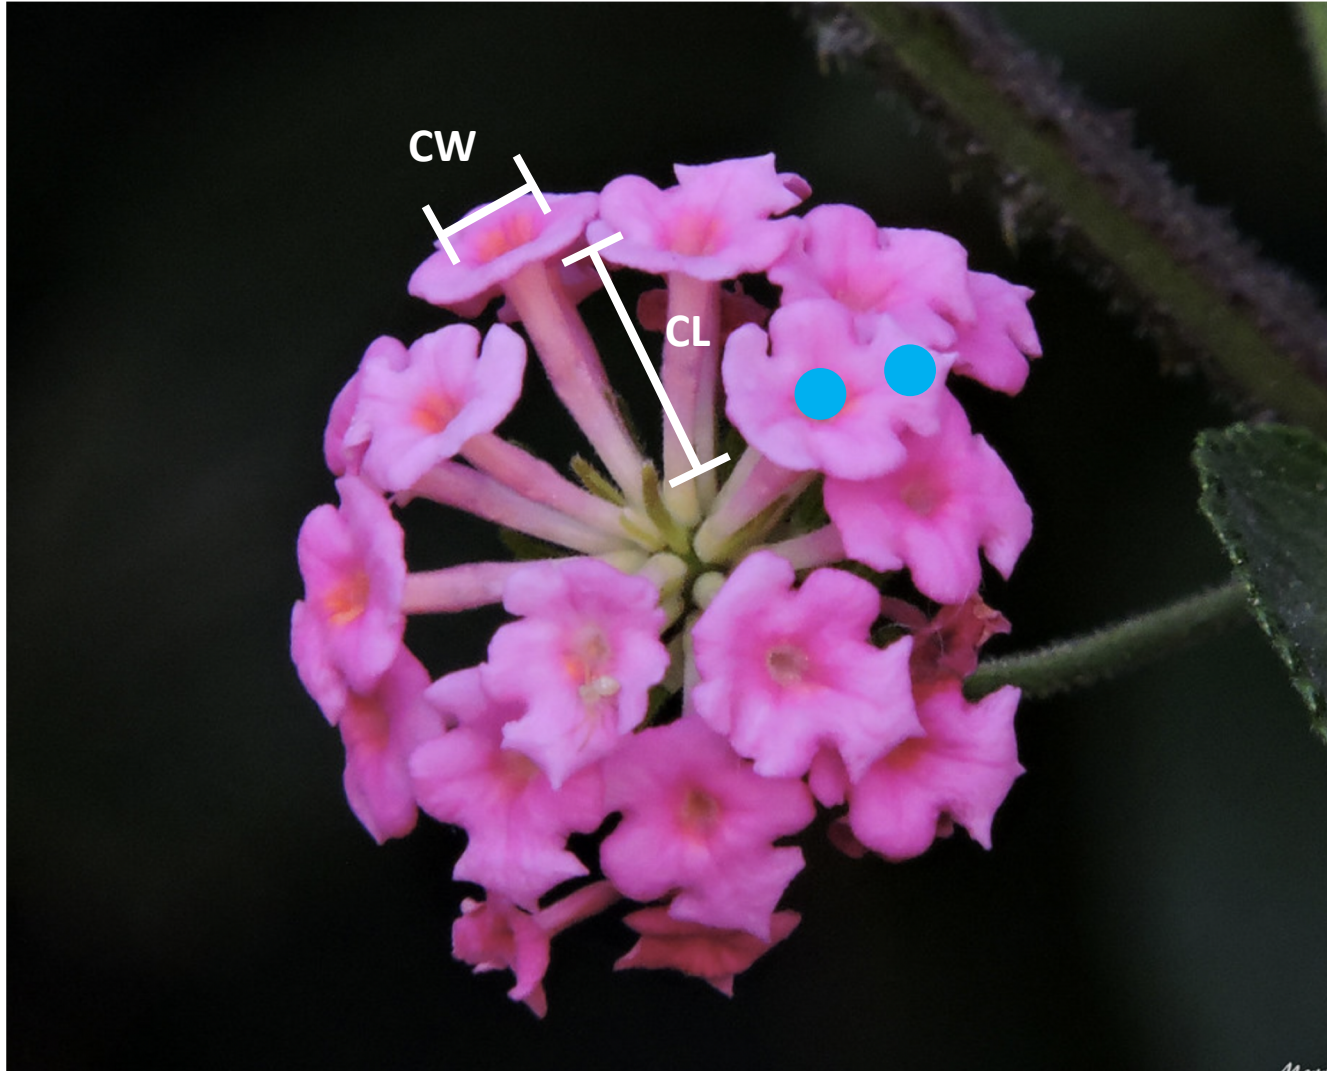

*Pentas lanceolata*

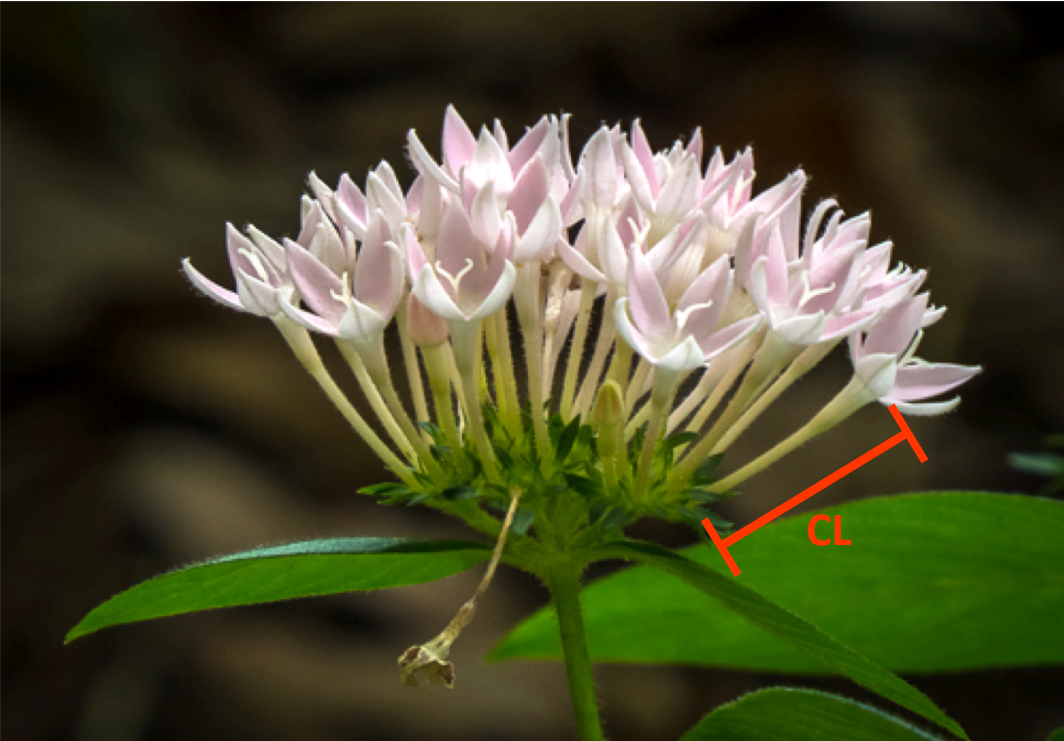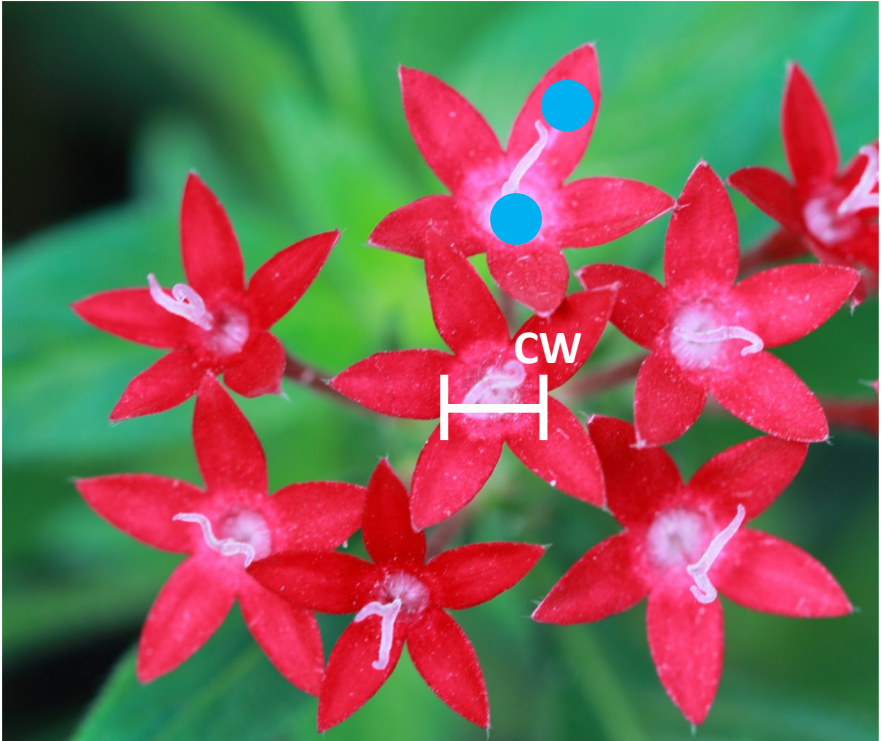

*Phlox paniculata*

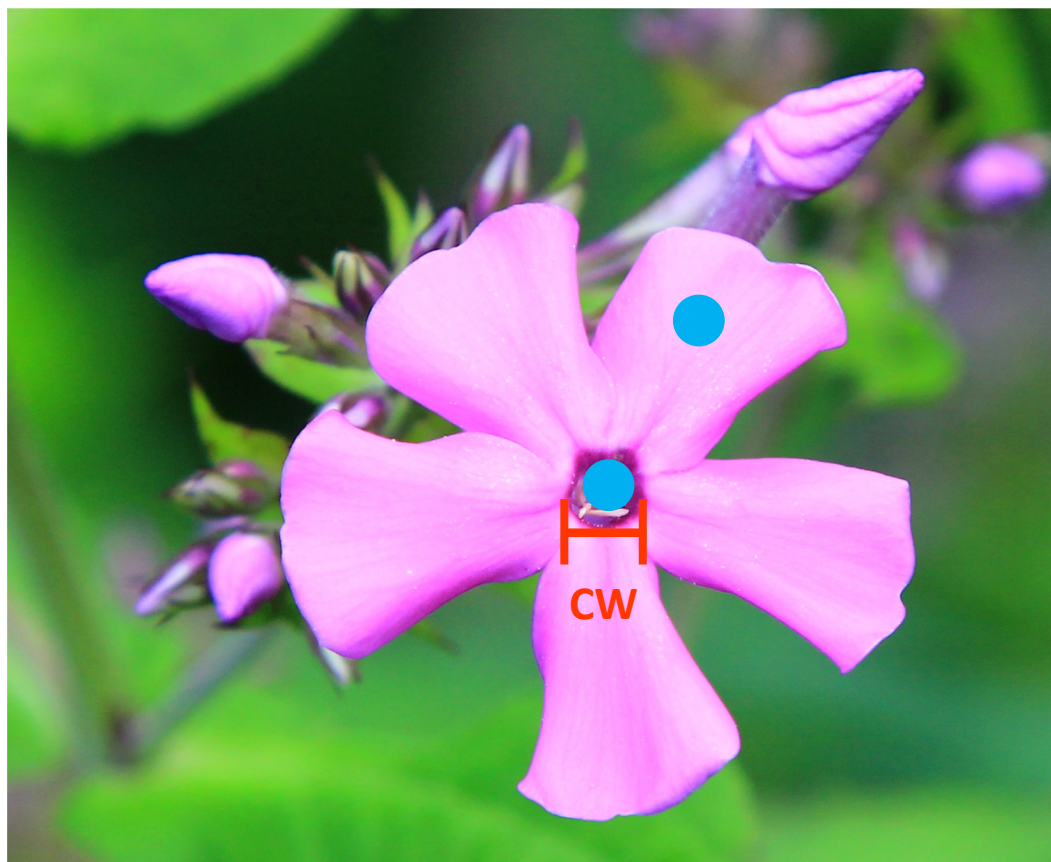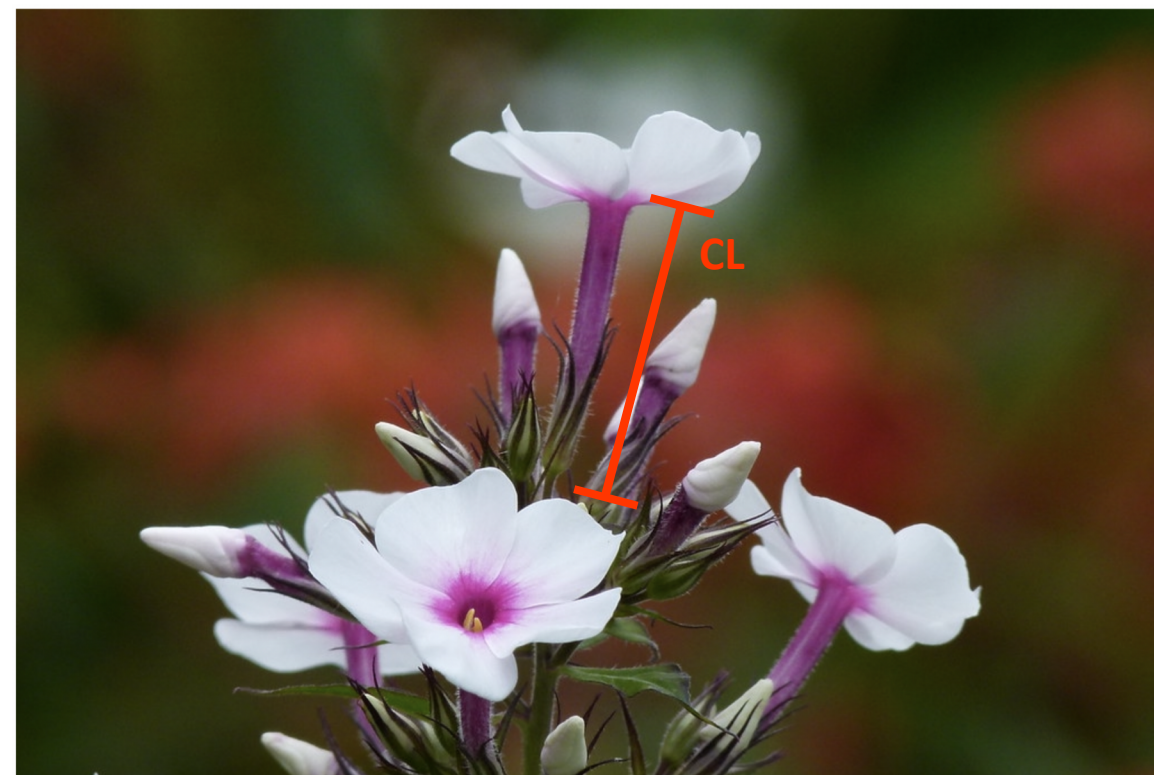

*Phytolacca americana*

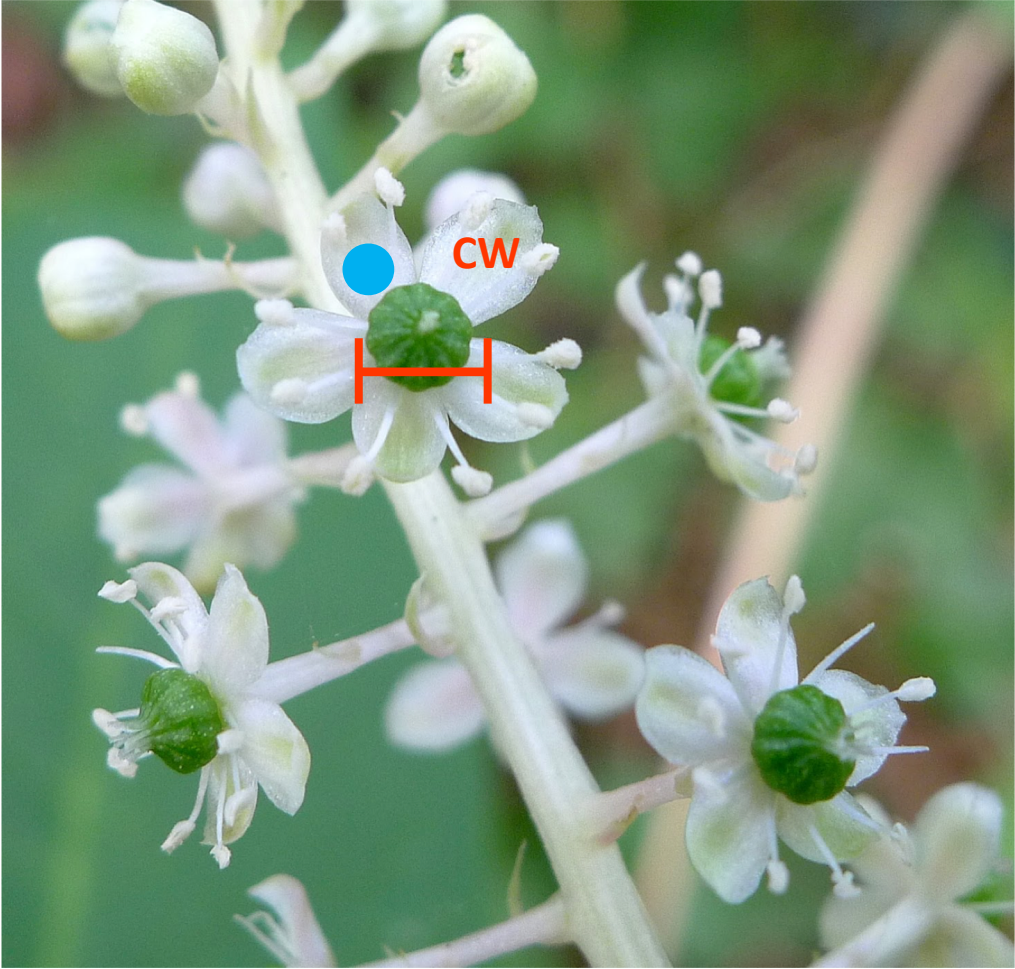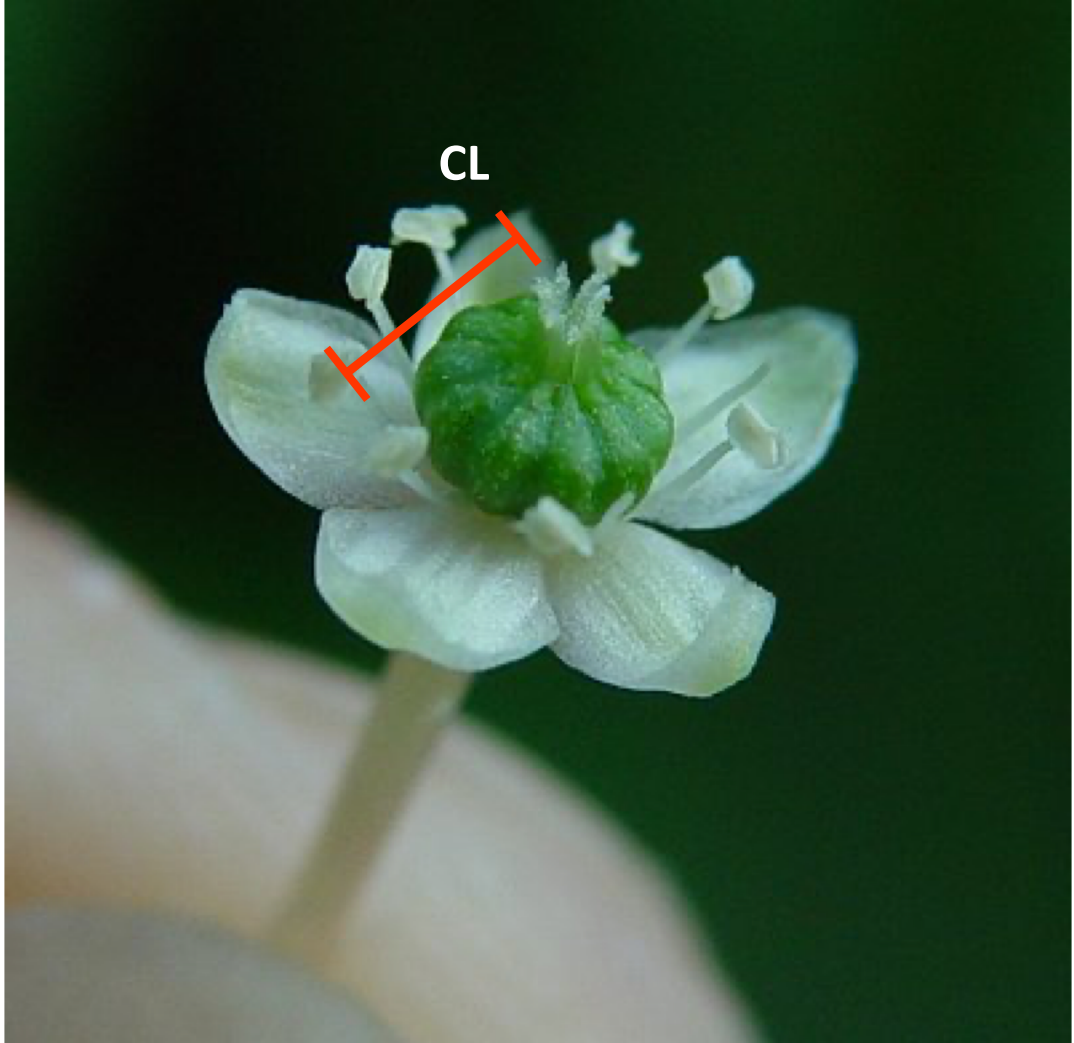

*Plectanthus* sp.

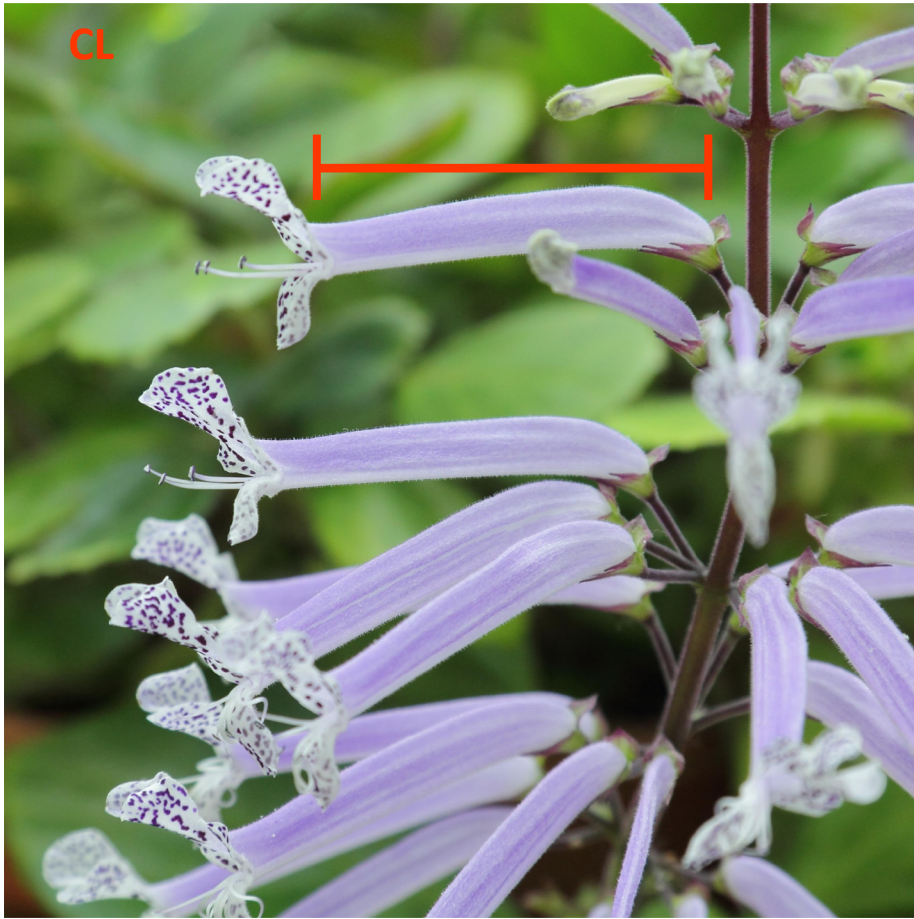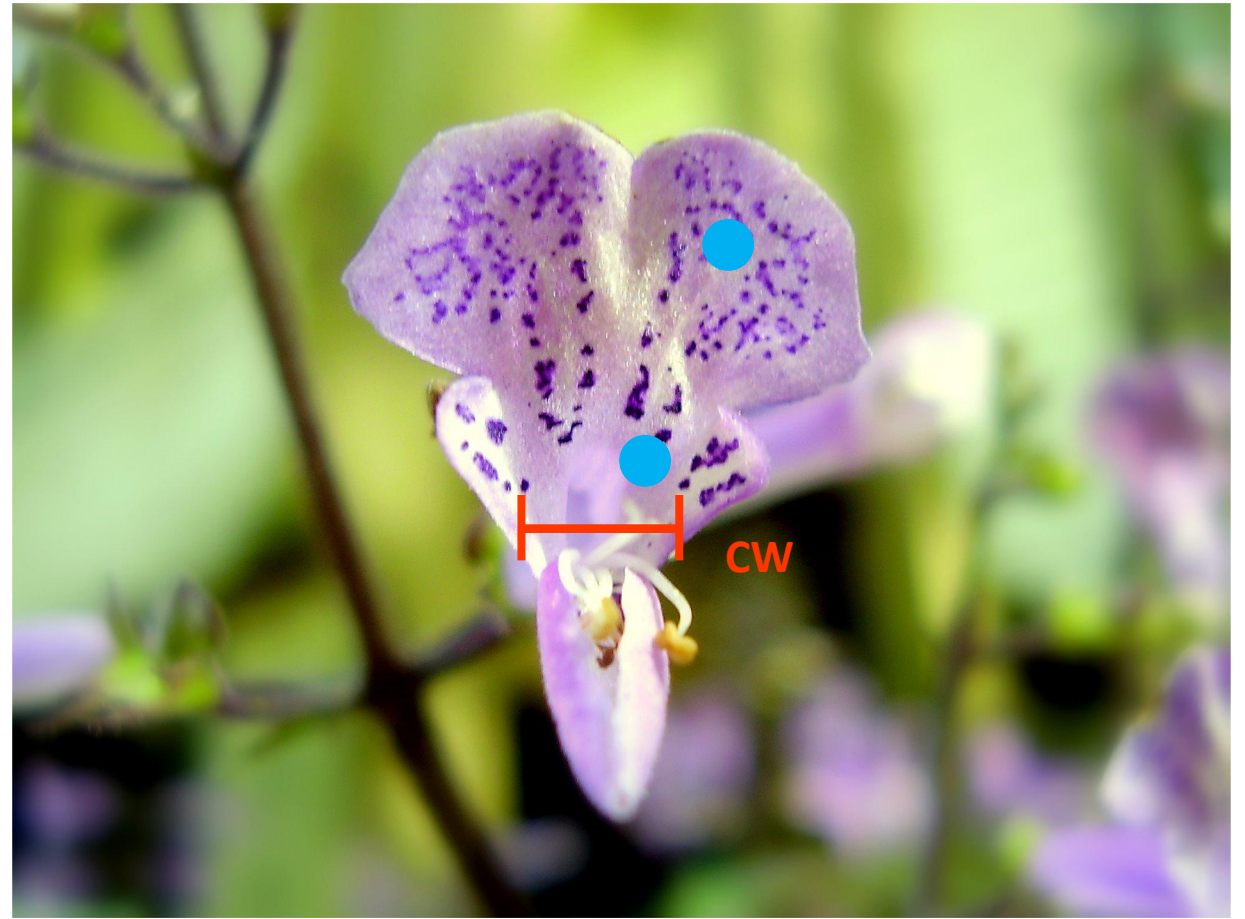

*Rudbeckia hirta*

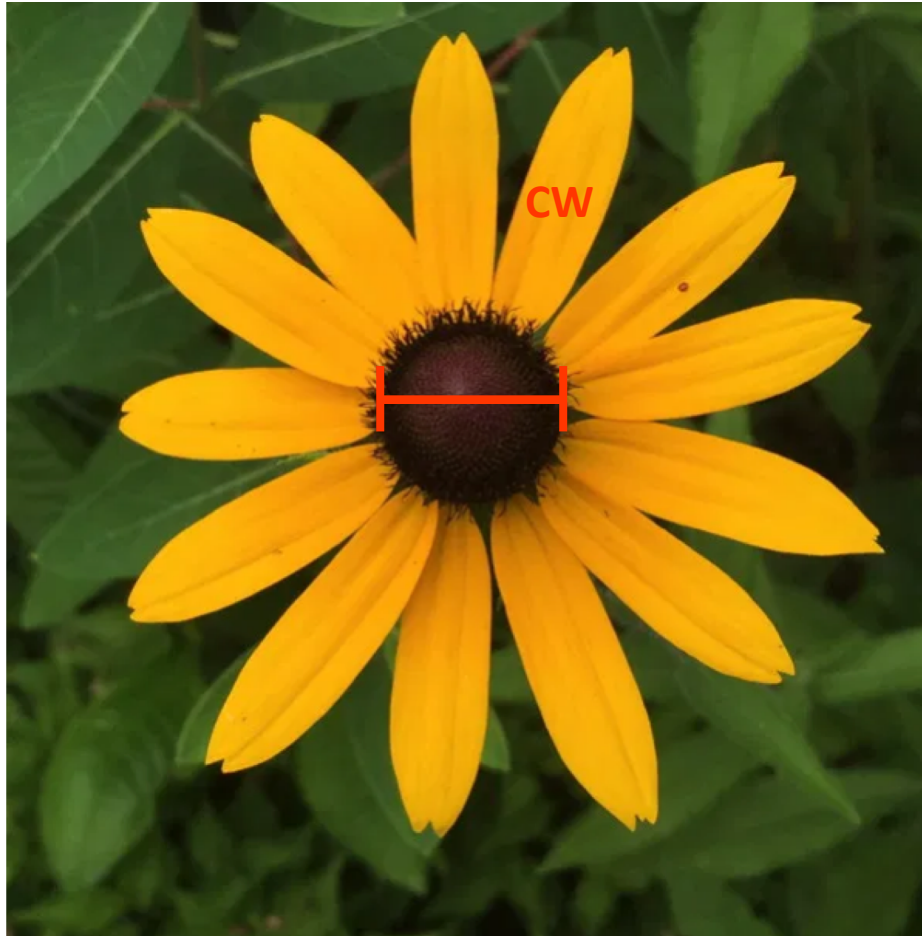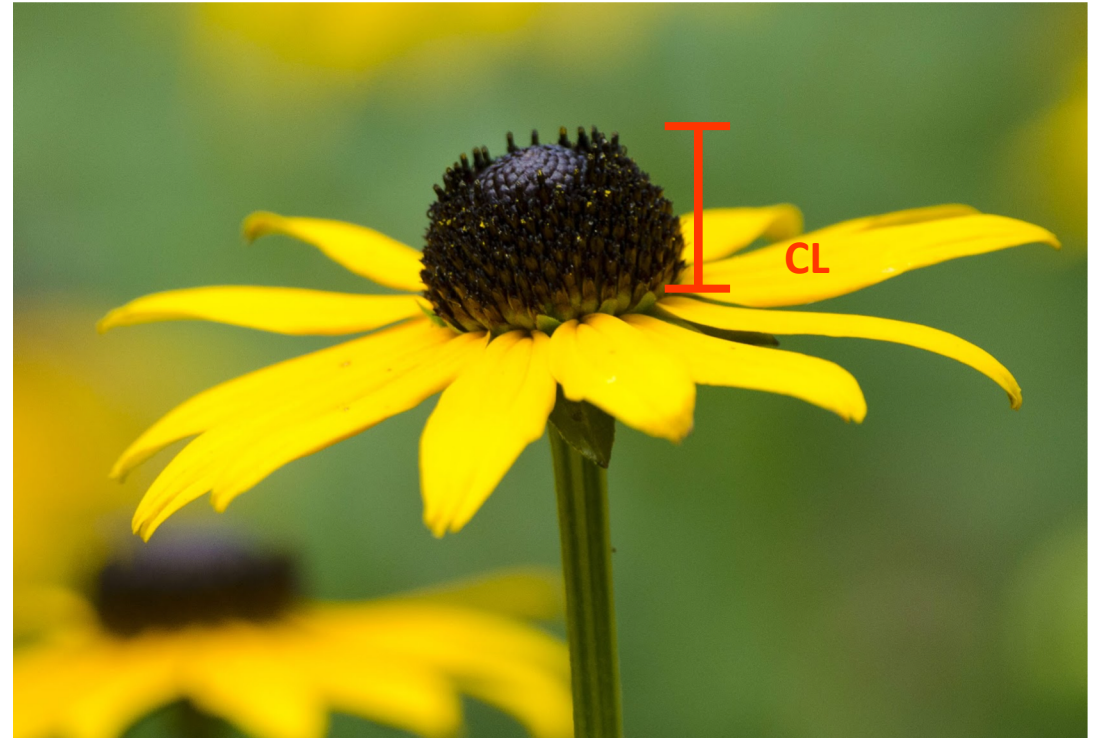

*Solidago nemoralis*

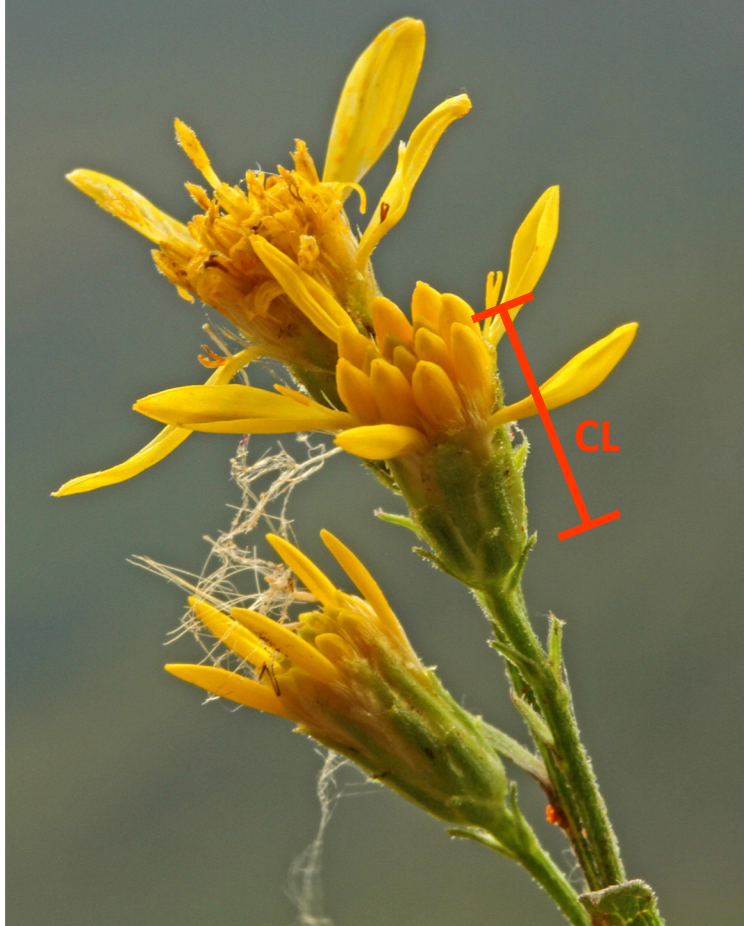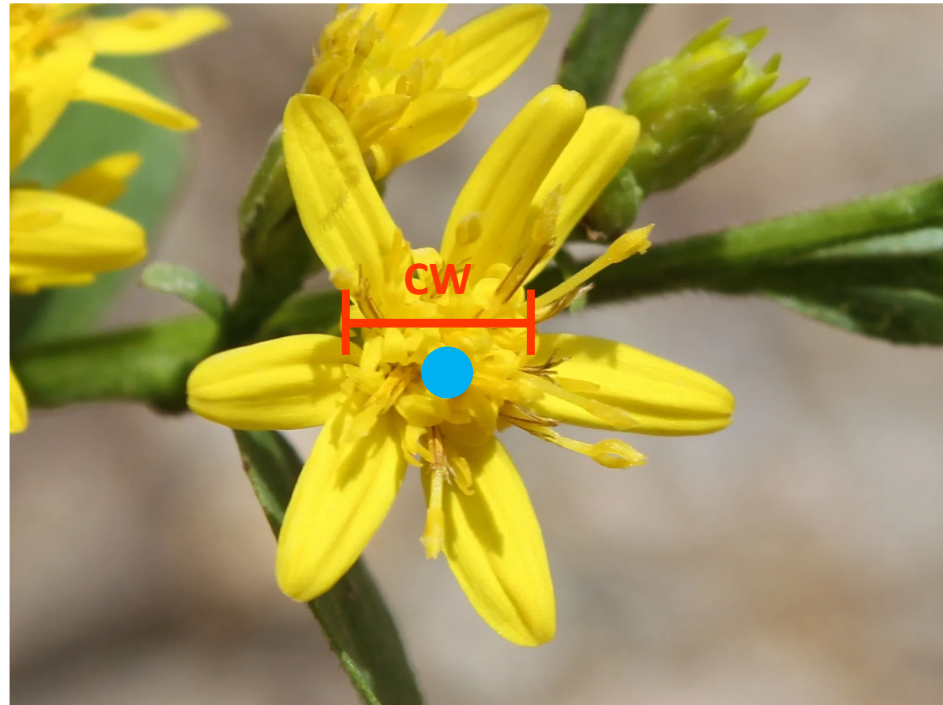



*Vitex agnus-castus*

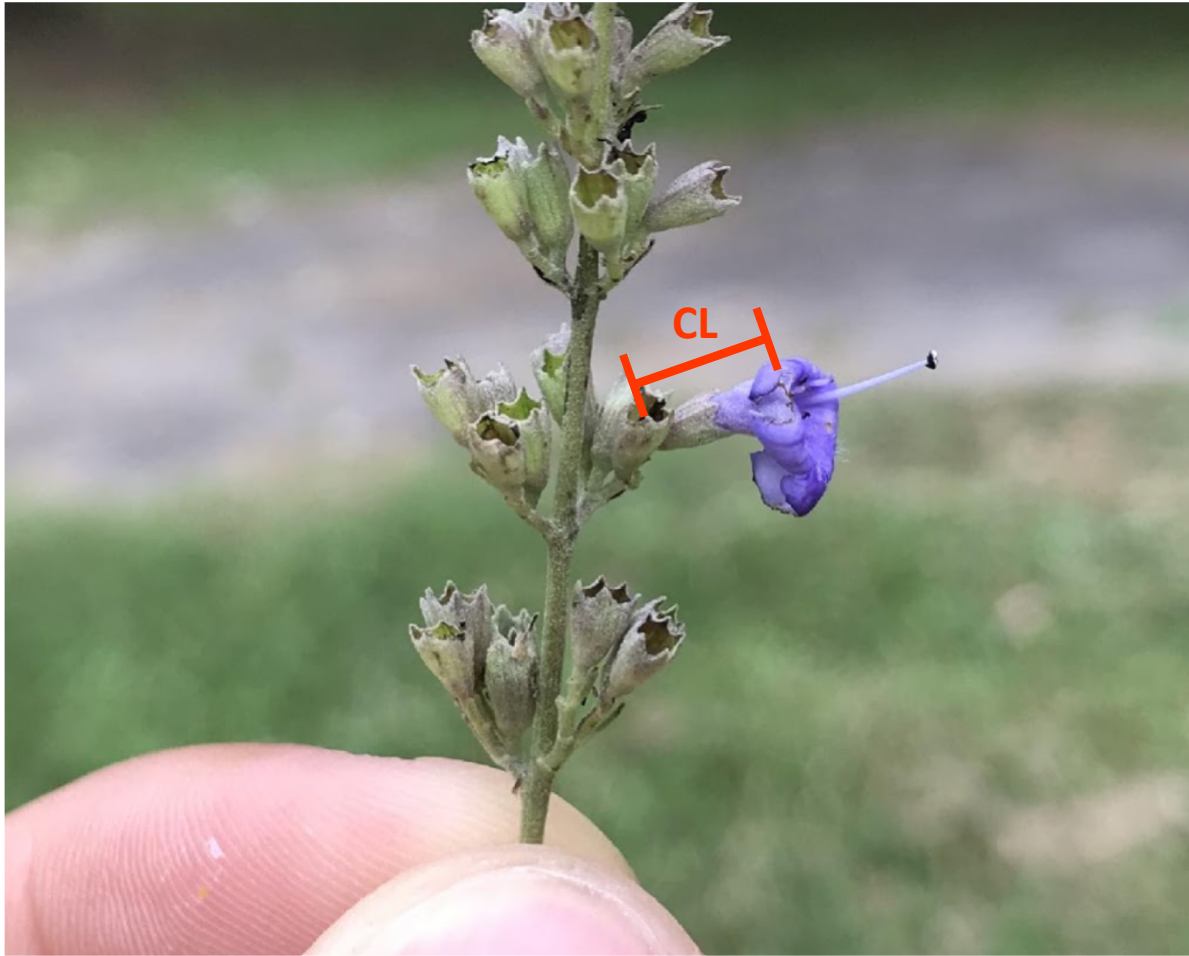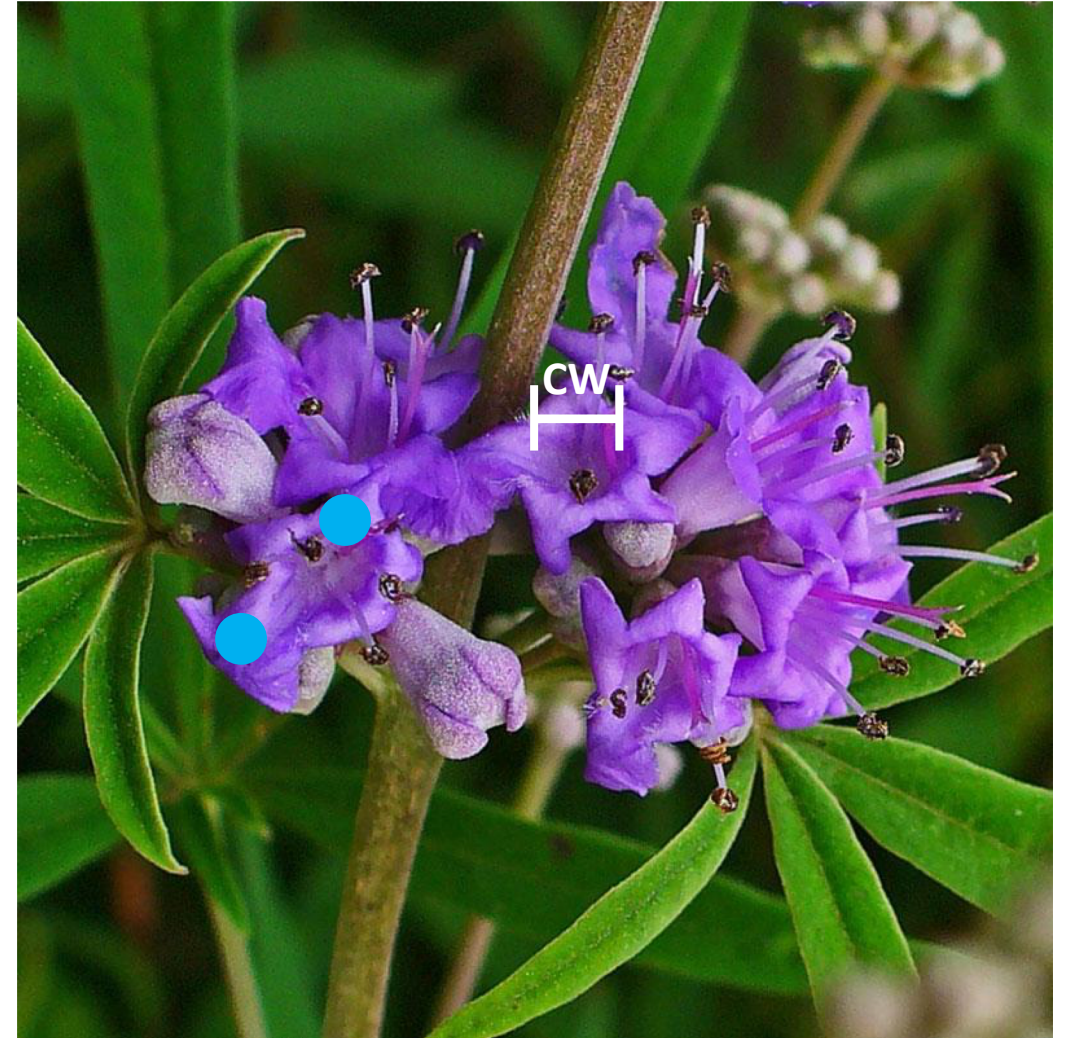

Supplement: ECY-103-e3730-s001.pdf [file ECY-103-e3730-s001.pdf]
